# Supplementary material
Source: ML conference proceedings conference paper supplement (https://openaccess.thecvf.com/content/ICCV_2019/html/Huang_Enhancing_Adversarial_Example_ICCV_2019_paper.html)
Supplement: Supplementary file 1 [file Huang_Enhancing_Adversarial_Example_ICCV_2019_supplemental.pdf]

# Enhancing Adversarial Example Transferability with an Intermediate Level Attack Supplementary Material

Qian Huang\*  
Cornell University  
qh53@cornell.edu

Isay Katsman\*  
Cornell University  
isk22@cornell.edu

Horace He\*  
Cornell University  
hh498@cornell.edu

Zeqi Gu\*  
Cornell University  
zg45@cornell.edu

Serge Belongie  
Cornell University  
sjb344@cornell.edu

Ser-Nam Lim  
Facebook AI  
sernam@gmail.com

This supplementary file consists of:

- A more thorough description of the networks used, the layers selected for attack, and full results on other attacks tested
- Complete disturbance graphs across layers of an attacking comprised of ILAP and I-FGSM
- A more complete result showing the comparison between ILAP and ILAF
- Full results for ILAP’s performance on ImageNet
- Visualization of decision boundary
- Results for different  $L_\infty$  norm values
- Results for ablating the learning rate used in ILAP
- Results comparing ILAP to TAP [8] on CIFAR-10

## A. ILAP Network Overview and Results for Other Base Attacks

As shown in the main paper, we tested ILAP against MI-FGSM, C&W, and TAP. We also tested I-FGSM, DeepFool, and FGSM. We test on a variety of models, namely: ResNet18 [1], SENet18 [2], DenseNet121[3] and GoogLeNet [7] trained on CIFAR-10. For each source model, each large block output in the source model and each attack  $A$ , we generate adversarial examples for all images in the test set using  $A$  with 20 iterations as a baseline. We then generate adversarial examples using  $A$  with 10 iterations as input to ILA, which will then run for 10 iterations. The learning rate is set to 0.002 for I-FGSM, 0.002 for I-FGSM with momentum and 0.006 for ILAP. We are in the  $L_\infty$  norm

\*Equal contribution.

setting with  $\epsilon = 0.03$  for all attacks. We then evaluate transferability of baseline and ILA adversarial examples over the other models by testing their accuracies, as shown in Figure 3.

Below is the list of layers (models from [5]) we picked for each source model, which is indexed starting from 0 in the experiment results:

- ResNet18: conv, bn, layer1, layer2, layer3, layer4, linear (layer1-4 are basic blocks)
- GoogLeNet: pre\_layers, a3, b3, maxpool, a4, b4, c4, d4, e4, a5, b5, avgpool, linear
- DenseNet121: conv1, dense1, trans1, dense2, trans2, dense3, trans3, dense4, bn, linear
- SENet18: conv1, bn1, layer1, layer2, layer3, layer4, linear (layer1-4 are pre-activation blocks)

Additional results for the I-FGSM, FGSM, and DeepFool attacks are given in tables 1 and 2. Note that the output of DeepFool is clipped to satisfy our  $\epsilon$ -ball constraint.

## B. Disturbance graphs

In this experiment, we used the same setting as our main experiment in Appendix A to generate adversarial examples, with only I-FGSM used as the reference attack. The average disturbance of each set of adversarial examples is calculated at each layer. We repeated the experiment for all four models described in Appendix A, as shown in Figure 4. Observe that the  $l$  in the legend refers to the hyperparameter set in the ILA attack, and afterwards the disturbance values were computed on layers indicated by the  $l$  in the x-axis.

Table 1: ILAP vs. I-FGSM and DeepFool Results

| Source                     | Transfer                 | I-FGSM |              |                  | DeepFool |              |                  |
|----------------------------|--------------------------|--------|--------------|------------------|----------|--------------|------------------|
|                            |                          | 20 Itr | 10 Itr ILAP  | Opt ILAP         | 50 Itr   | 25 Itr ILAP  | Opt ILAP         |
| ResNet18<br>( $l = 4$ )    | ResNet18 <sup>†</sup>    | 3.3%   | 7.6%         | <b>1.8%</b> (5)  | 48.7%    | 12.9%        | <b>5.4%</b> (5)  |
|                            | SENet18                  | 44.4%  | <b>27.5%</b> | <b>27.5%</b> (4) | 87.4%    | <b>43.7%</b> | <b>43.7%</b> (4) |
|                            | DenseNet121              | 45.8%  | <b>27.7%</b> | <b>27.7%</b> (4) | 89.1%    | <b>43.8%</b> | <b>43.8%</b> (4) |
|                            | GoogLeNet                | 58.6%  | <b>35.8%</b> | <b>35.8%</b> (4) | 89.3%    | <b>50.7%</b> | <b>50.7%</b> (4) |
| SENet18<br>( $l = 4$ )     | ResNet18                 | 36.8%  | <b>25.8%</b> | <b>25.8%</b> (4) | 91.9%    | 40.3%        | <b>39.9%</b> (5) |
|                            | SENet18 <sup>†</sup>     | 2.4%   | 7.9%         | <b>2.3%</b> (6)  | 56.8%    | 11.4%        | <b>5.1%</b> (6)  |
|                            | DenseNet121              | 38.0%  | <b>25.9%</b> | <b>25.9%</b> (4) | 92.9%    | 41.3%        | <b>41.1%</b> (5) |
|                            | GoogLeNet                | 48.4%  | <b>33.7%</b> | <b>33.7%</b> (4) | 92.3%    | <b>48.7%</b> | <b>48.7%</b> (4) |
| DenseNet121<br>( $l = 6$ ) | ResNet18                 | 45.1%  | <b>26.7%</b> | <b>26.7%</b> (6) | 81.6%    | <b>30.1%</b> | <b>30.1%</b> (6) |
|                            | SENet18                  | 43.4%  | <b>26.1%</b> | <b>26.1%</b> (6) | 81.5%    | 29.0%        | <b>28.9%</b> (7) |
|                            | DenseNet121 <sup>†</sup> | 2.6%   | 1.7%         | <b>0.8%</b> (9)  | 34.9%    | 4.1%         | <b>3.3%</b> (9)  |
|                            | GoogLeNet                | 47.3%  | <b>28.6%</b> | <b>28.6%</b> (6) | 82.3%    | <b>32.4%</b> | <b>32.4%</b> (6) |
| GoogLeNet<br>( $l = 9$ )   | ResNet18                 | 55.9%  | 34.0%        | <b>32.7%</b> (3) | 92.3%    | <b>44.0%</b> | <b>44.0%</b> (9) |
|                            | SENet18                  | 55.6%  | 33.1%        | <b>31.8%</b> (3) | 92.1%    | <b>42.9%</b> | <b>42.9%</b> (9) |
|                            | DenseNet121              | 48.9%  | 28.7%        | <b>28.1%</b> (3) | 93.1%    | <b>38.1%</b> | <b>38.1%</b> (9) |
|                            | GoogLeNet <sup>†</sup>   | 0.9%   | 0.8%         | <b>0.4%</b> (11) | 51.5%    | 4.2%         | <b>3.9%</b> (11) |

Table 1. Accuracies after attack using ILAP based on I-FGSM and DeepFool. Note that although significant improvement for transfer is exhibited for DeepFool, the original attack transfer rates are quite poor (the accuracies are still quite high after a DeepFool transfer attack).

### C. ILAP vs ILAF Full Result

As described in the main paper, we compared the performance of ILAP and ILAF with a range of  $\alpha$ . We used the same setting as our main experiment in Appendix A for ILAP and ILAF to generate adversarial examples, with only I-FGSM used as the reference attack. The result is shown in Figure 5.

### D. ILAP on ImageNet Full Result

We tested ILAP against I-FGSM and I-FGSM with momentum on ImageNet similarly to the experiment on CIFAR-10. The models we used are ResNet18, DenseNet121, SqueezeNet1.0 and AlexNet. The learning rate is set to 0.008 for I-FGSM, 0.01 for ILAP plus I-FGSM, 0.018 for I-FGSM with momentum and 0.018 for ILAP plus I-FGSM with momentum. To evaluate transferability, we test the accuracies of different models over adversarial examples generated from all 50000 ImageNet test images, as shown in Figure 6.

Below is the list of layers (models from [6]) we picked for each source model:

- ResNet18: conv1, bn1, layer1, layer2, layer3, layer4, fc
- DenseNet121: conv0, denseblock1, transition1, dense-

block2, transition2, denseblock3, transition3, denseblock4, norm5, classifier

- SqueezeNet1.0: Features: 0 3 4 5 7 8 9 10 12, classifier
- AlexNet: Features: 0 3 4 6 8 10, classifiers: 1 4

### E. Visualization of the Decision Boundary

To gain some understanding over how ILA interplays with the decision boundaries, we visualize the two dimensional plane between the initial I-FGSM perturbation and the ILA perturbation for some examples. Visualization is done on Resnet with layer 4, and I-FGSM as the starting perturbation. See Figure 7.

### F. Fooling with Different $L_\infty$ Values

In this experiment, we use ILAP to generate adversarial examples with an I-FGSM baseline attack on ResNet18 with  $\epsilon = 0.02, 0.03, 0.04, 0.05$ , while other settings are kept the same as in section A. We then evaluated their transferability against I-FGSM baseline on the adversarial examples of the whole test set, as shown in Figure 8.

Table 2: ILAP vs. FGSM Results

| Source                     | Transfer                 | FGSM   |              |                  |
|----------------------------|--------------------------|--------|--------------|------------------|
|                            |                          | 20 Itr | 10 Itr ILAP  | Opt ILAP         |
| ResNet18<br>( $l = 6$ )    | ResNet18 <sup>†</sup>    | 47.7%  | <b>2.0%</b>  | <b>2.0%</b> (6)  |
|                            | SENet18                  | 63.6%  | <b>42.6%</b> | <b>42.6%</b> (6) |
|                            | DenseNet121              | 64.9%  | 44.6%        | <b>44.5%</b> (5) |
|                            | GoogLeNet                | 66.5%  | 55.5%        | <b>54.2%</b> (4) |
| SENet18<br>( $l = 6$ )     | ResNet18                 | 60.7%  | 37.4%        | <b>36.1%</b> (5) |
|                            | SENet18 <sup>†</sup>     | 40.7%  | <b>3.0%</b>  | <b>3.0%</b> (6)  |
|                            | DenseNet121              | 61.8%  | 37.0%        | <b>36.3%</b> (5) |
|                            | GoogLeNet                | 63.8%  | 46.3%        | <b>45.3%</b> (5) |
| DenseNet121<br>( $l = 7$ ) | ResNet18                 | 65.0%  | 36.4%        | <b>36.2%</b> (6) |
|                            | SENet18                  | 65.0%  | <b>35.5%</b> | <b>35.5%</b> (7) |
|                            | DenseNet121 <sup>†</sup> | 47.3%  | 5.8%         | <b>0.9%</b> (9)  |
|                            | GoogLeNet                | 64.6%  | 37.6%        | <b>37.4%</b> (6) |
| GoogLeNet<br>( $l = 9$ )   | ResNet18                 | 64.9%  | <b>43.5%</b> | <b>43.5%</b> (9) |
|                            | SENet18                  | 65.1%  | <b>43.8%</b> | <b>43.8%</b> (9) |
|                            | DenseNet121              | 63.7%  | <b>39.7%</b> | <b>39.7%</b> (9) |
|                            | GoogLeNet <sup>†</sup>   | 36.6%  | 5.9%         | <b>0.6%</b> (12) |

<sup>†</sup> Same model as source model.

Table 2. Accuracies after attack based on FGSM. Note that significant improvement occurs in the ILAP settings.

## G. Learning Rate Ablation

We set iterations to 20 for both I-FGSM and I-FGSM with Momentum and experimented different learning rates on ResNet18. We then evaluate different models’ accuracies on the generated  $50 \times 32 = 1600$  adversarial examples, as shown in Table 3 and 4.

## H. Comparison to TAP [8]

CIFAR-10 [4] results comparing a 20 iteration TAP [8] baseline to 10 iterations of ILAP using the output of a 10 iteration TAP attack are shown in Table 5.

## References

- [1] K. He, X. Zhang, S. Ren, and J. Sun. Deep residual learning for image recognition. *2016 IEEE Conference on Computer Vision and Pattern Recognition (CVPR)*, pages 770–778, 2016.
- [2] J. Hu, L. Shen, and G. Sun. Squeeze-and-excitation networks. *CoRR*, abs/1709.01507, 2017.
- [3] G. Huang, Z. Liu, L. van der Maaten, and K. Q. Weinberger. Densely connected convolutional networks. *2017 IEEE Conference on Computer Vision and Pattern Recognition (CVPR)*, pages 2261–2269, 2017.
- [4] A. Krizhevsky. Learning multiple layers of features from tiny images. 2009.
- [5] K. Liu. Pytorch cifar10. <https://github.com/kuangliu/pytorch-cifar>, 2018.
- [6] S. Marcel and Y. Rodriguez. Torchvision the machine-vision package of torch. In *ACM Multimedia*, 2010.
- [7] C. Szegedy, W. Liu, Y. Jia, P. Sermanet, S. E. Reed, D. Anguelov, D. Erhan, V. Vanhoucke, and A. Rabinovich. Going deeper with convolutions. *2015 IEEE Conference on Computer Vision and Pattern Recognition (CVPR)*, pages 1–9, 2015.
- [8] W. Zhou, X. Hou, Y. Chen, M. Tang, X. Huang, X. Gan, and Y. Yang. Transferable adversarial perturbations. In *ECCV*, 2018.

Table 3: Learning rate ablation for I-FGSM

| learning rate | ResNet18 <sup>†</sup> | SENet18 | DenseNet121 | GoogLeNet |
|---------------|-----------------------|---------|-------------|-----------|
| 0.002         | 3.3%                  | 44.9%   | 47.1%       | 59.3%     |
| 0.008         | 0.8%                  | 45.6%   | 46.8%       | 60.0%     |
| 0.014         | 0.6%                  | 47.2%   | 49.4%       | 59.5%     |
| 0.02          | 1.3%                  | 46.8%   | 51.4%       | 59.8%     |

Table 4: Learning rate ablation for I-FGSM with Momentum

| learning rate | ResNet18 <sup>†</sup> | SENet18 | DenseNet121 | GoogLeNet |
|---------------|-----------------------|---------|-------------|-----------|
| 0.002         | 5.9%                  | 35.0%   | 36.6%       | 46.1%     |
| 0.008         | 0.6%                  | 43.0%   | 43.8%       | 56.1%     |
| 0.014         | 0.4%                  | 43.6%   | 45.2%       | 55.9%     |
| 0.02          | 0.4%                  | 44.1%   | 46.4%       | 57.2%     |

Table 5: ILAP vs. TAP Results

| Source                     | Transfer                 | TAP [8] |                  |
|----------------------------|--------------------------|---------|------------------|
|                            |                          | 20 ltr  | Opt ILAP         |
| ResNet18<br>( $l = 4$ )    | ResNet18 <sup>†</sup>    | 6.2%    | <b>1.9%</b> (6)  |
|                            | SENet18                  | 31.6%   | <b>28.4%</b> (4) |
|                            | DenseNet121              | 32.7%   | <b>28.5%</b> (4) |
|                            | GoogLeNet                | 41.6%   | <b>36.8%</b> (4) |
| SENet18<br>( $l = 4$ )     | ResNet18                 | 31.4%   | <b>23.5%</b> (4) |
|                            | SENet18 <sup>†</sup>     | 2.0%    | <b>1.7%</b> (5)  |
|                            | DenseNet121              | 31.3%   | <b>24.1%</b> (4) |
|                            | GoogLeNet                | 41.5%   | <b>33.1%</b> (4) |
| DenseNet121<br>( $l = 6$ ) | ResNet18                 | 35.2%   | <b>27.4%</b> (6) |
|                            | SENet18                  | 34.2%   | <b>26.8%</b> (7) |
|                            | DenseNet121 <sup>†</sup> | 4.8%    | <b>1.0%</b> (9)  |
|                            | GoogLeNet                | 37.8%   | <b>29.8%</b> (6) |
| GoogLeNet<br>( $l = 9$ )   | ResNet18                 | 37.1%   | <b>33.6%</b> (9) |
|                            | SENet18                  | 36.5%   | <b>32.9%</b> (9) |
|                            | DenseNet121              | 32.6%   | <b>28.1%</b> (9) |
|                            | GoogLeNet <sup>†</sup>   | 1.3%    | <b>0.4%</b> (12) |

<sup>†</sup> Same model as source model.

Table 5. Same as experiment in Table 2 of the main paper but with TAP. Hyperparameters for TAP are set to  $lr = 0.002$ ,  $\epsilon = 0.03$ ,  $\lambda = 0.005$ ,  $\alpha = 0.5$ ,  $s = 3$ ,  $\eta = 0.01$ .

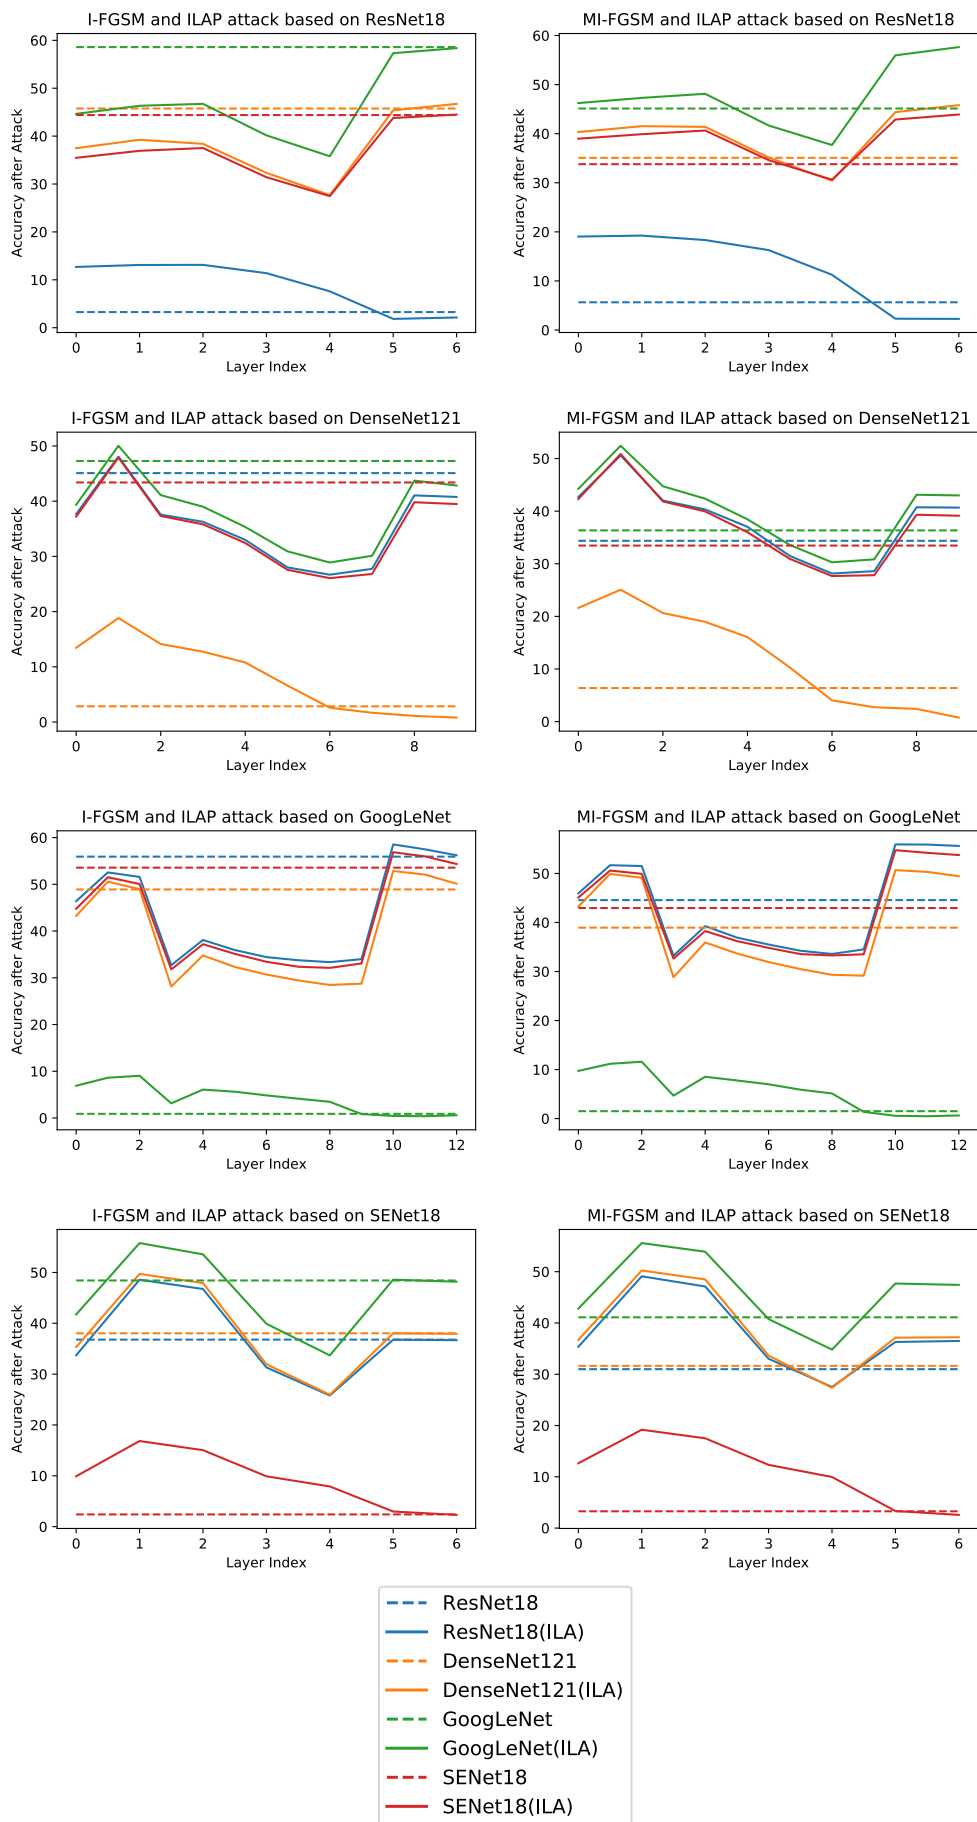

Figure 1: Visualizations for ILAP against I-FGSM and MI-FGSM baselines on CIFAR-10

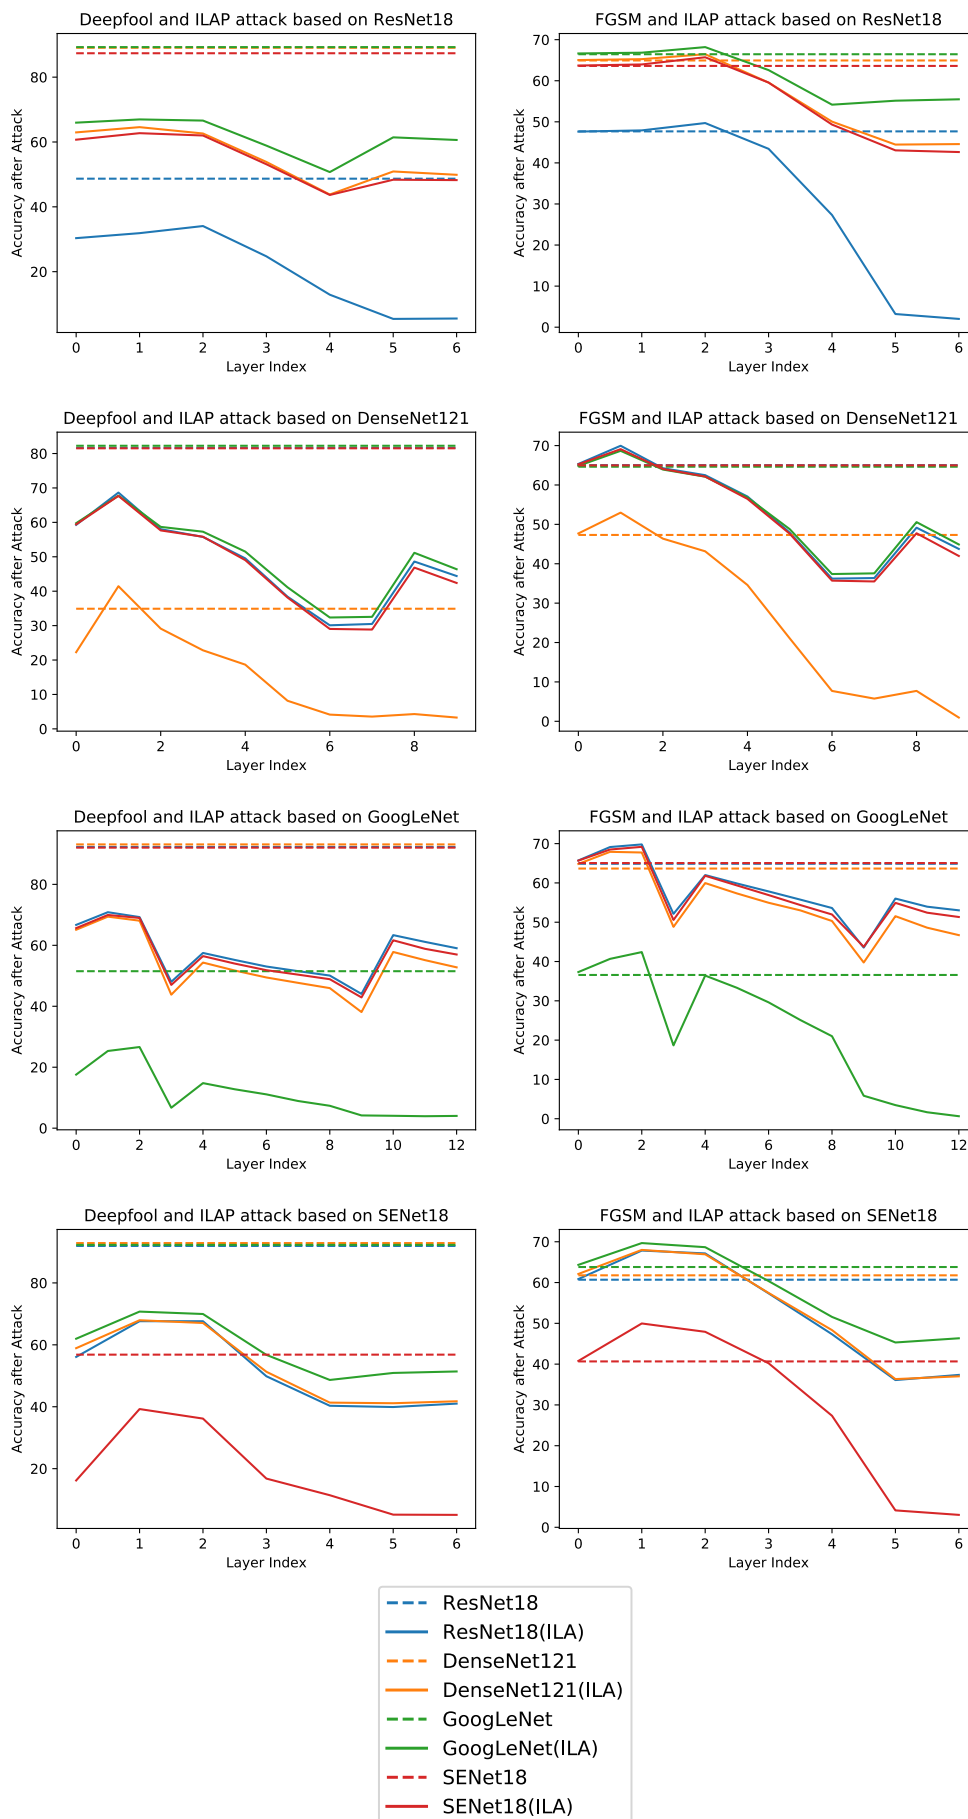

Figure 2: Visualizations for ILAP against Deepfool and FGSM with momentum baselines on CIFAR-10

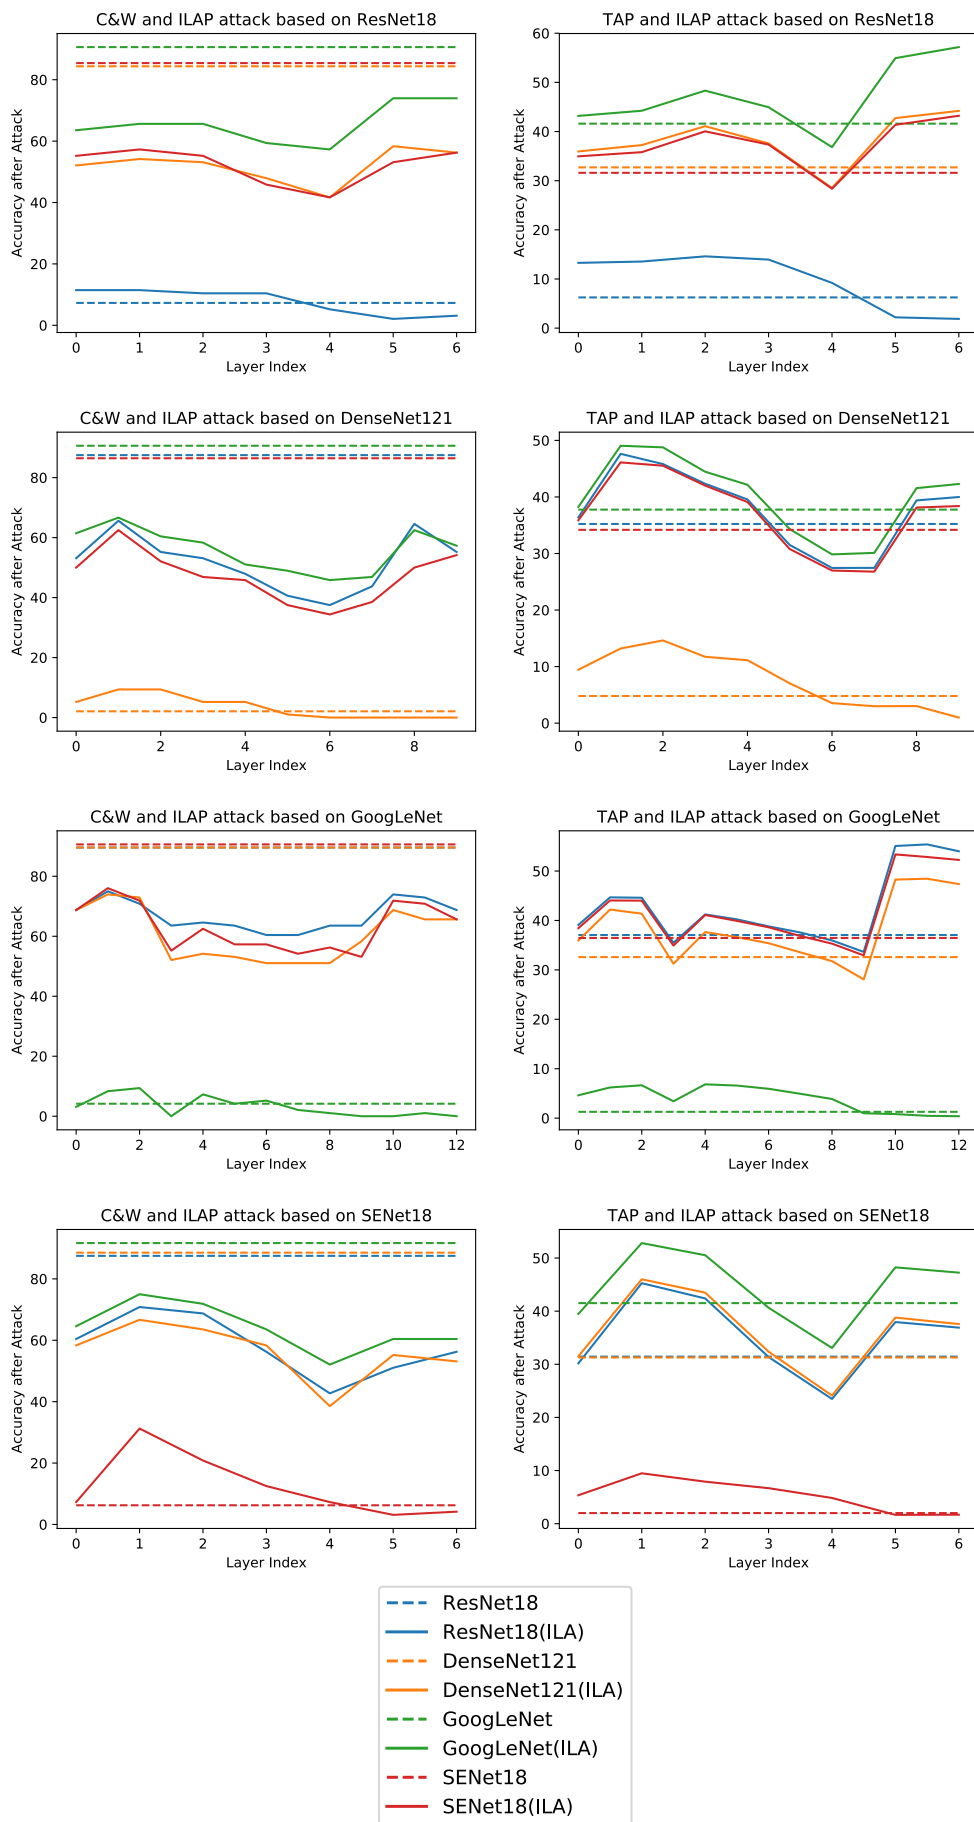

Figure 3: Visualizations for ILAP against Deepfool and FGSM with momentum baselines on CIFAR-10

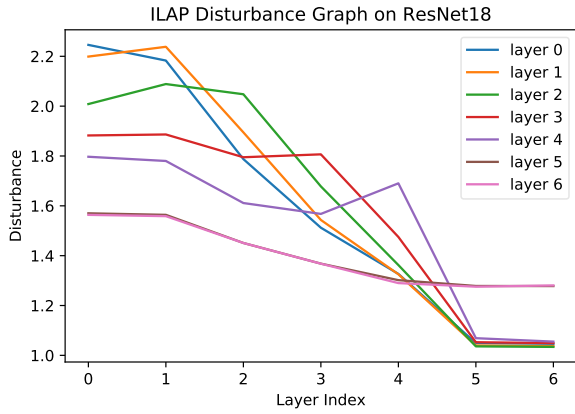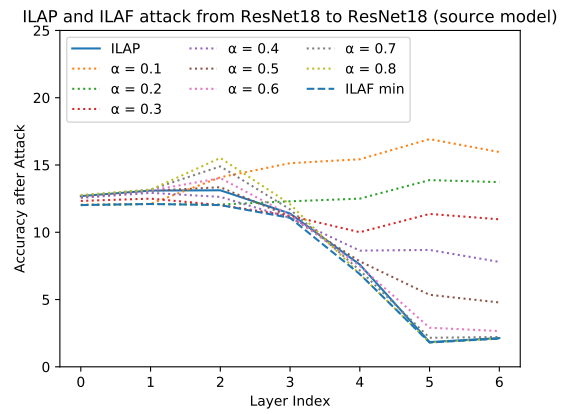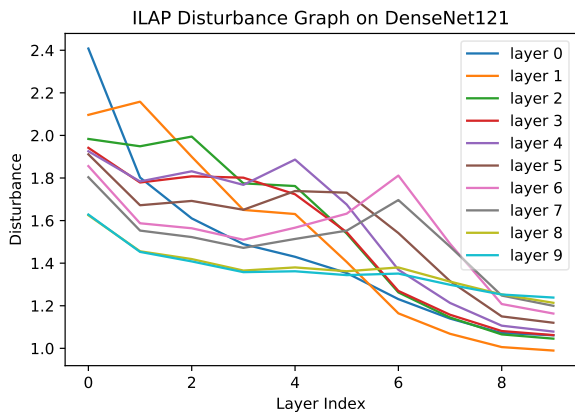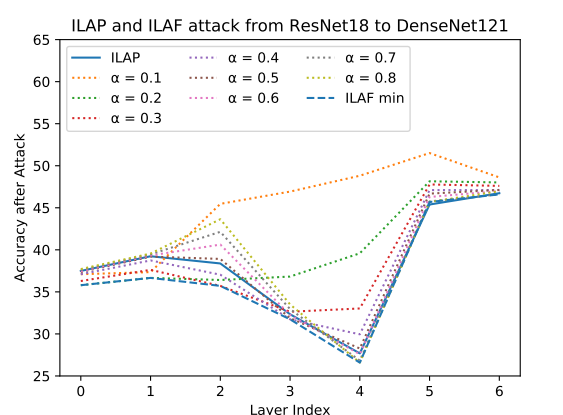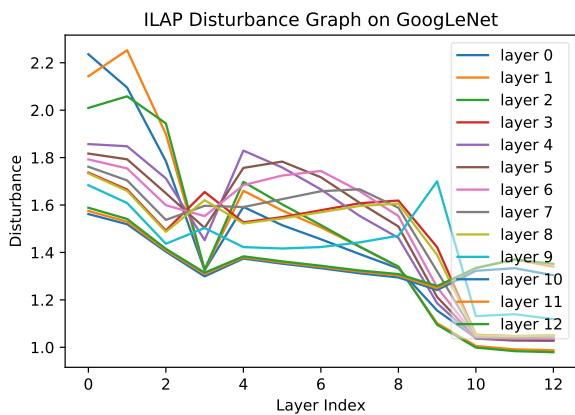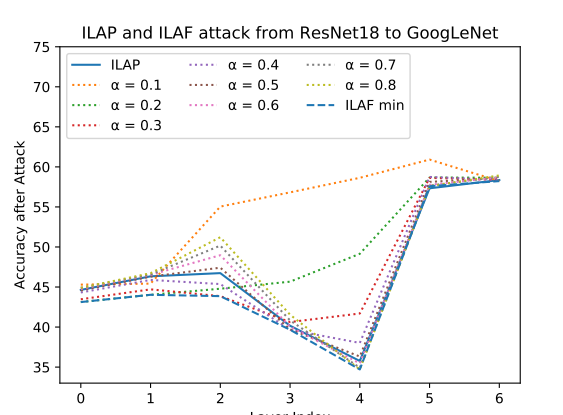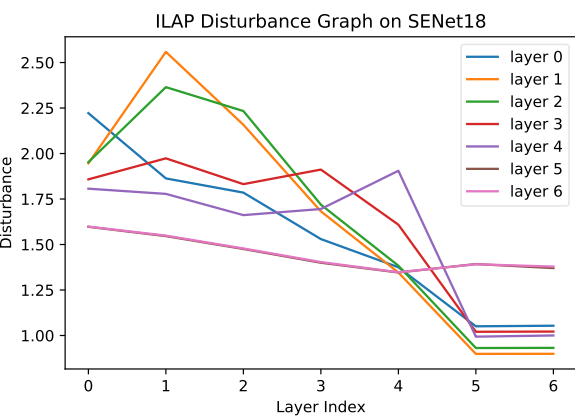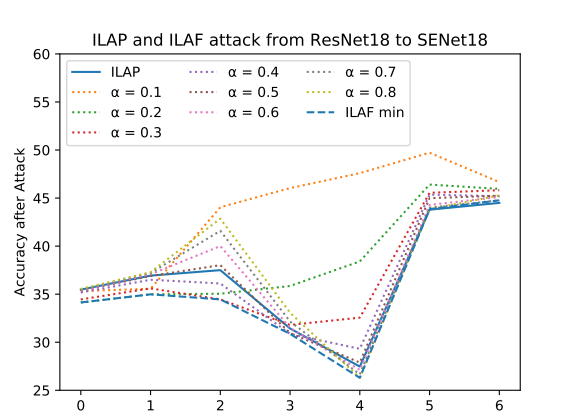

Figure 4: Disturbance graphs of ILAP with I-FGSM as reference

Figure 5: ILAP vs ILAF comparisons



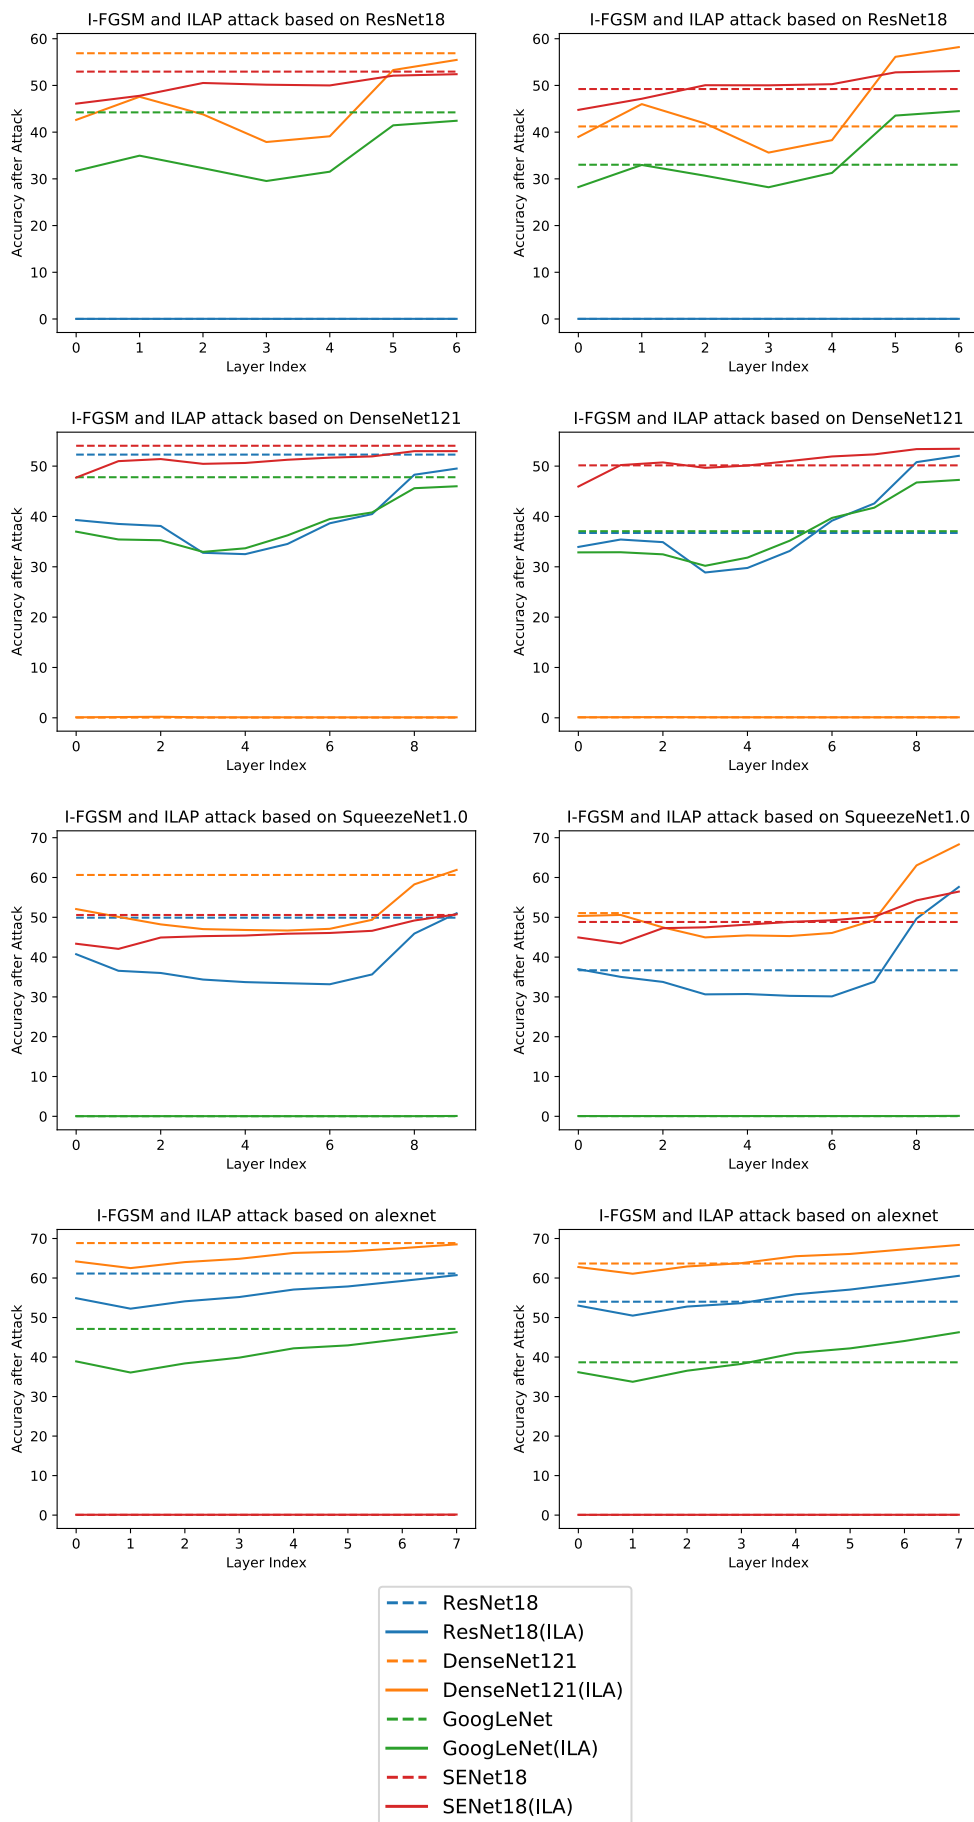

Figure 6: Visualizations for ILAP against I-FGSM and I-FGSM with momentum baselines on ImageNet

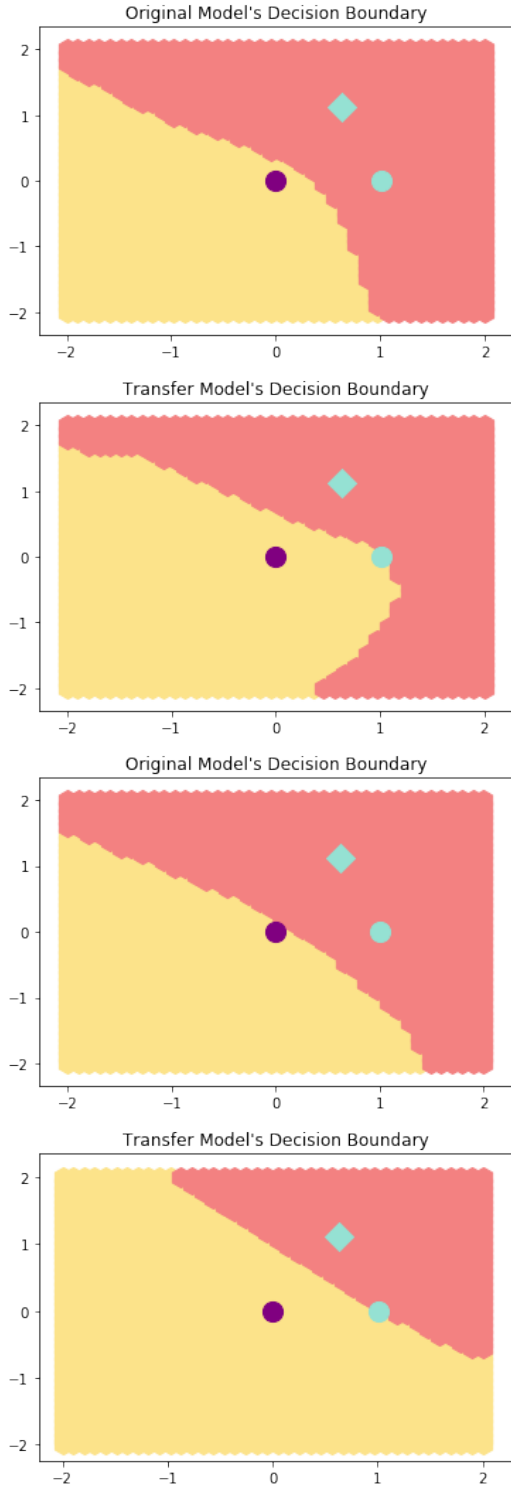

Figure 7: Visualization of the decision boundary relative to the two adversarial examples generated. Yellow is the correct label's decision space, red is the incorrect label's decision space. The purple dot is the original image's location, the green circle is the I-FGSM perturbation, and the green diamond is the ILA perturbation. Note that for the above, it seems the vector between the purple dot and green diamond is more orthogonal to the decision boundary than the vector between the purple dot and green dot (hence roughly indicating that ILA is working as intended in producing a more orthogonal transfer vector).

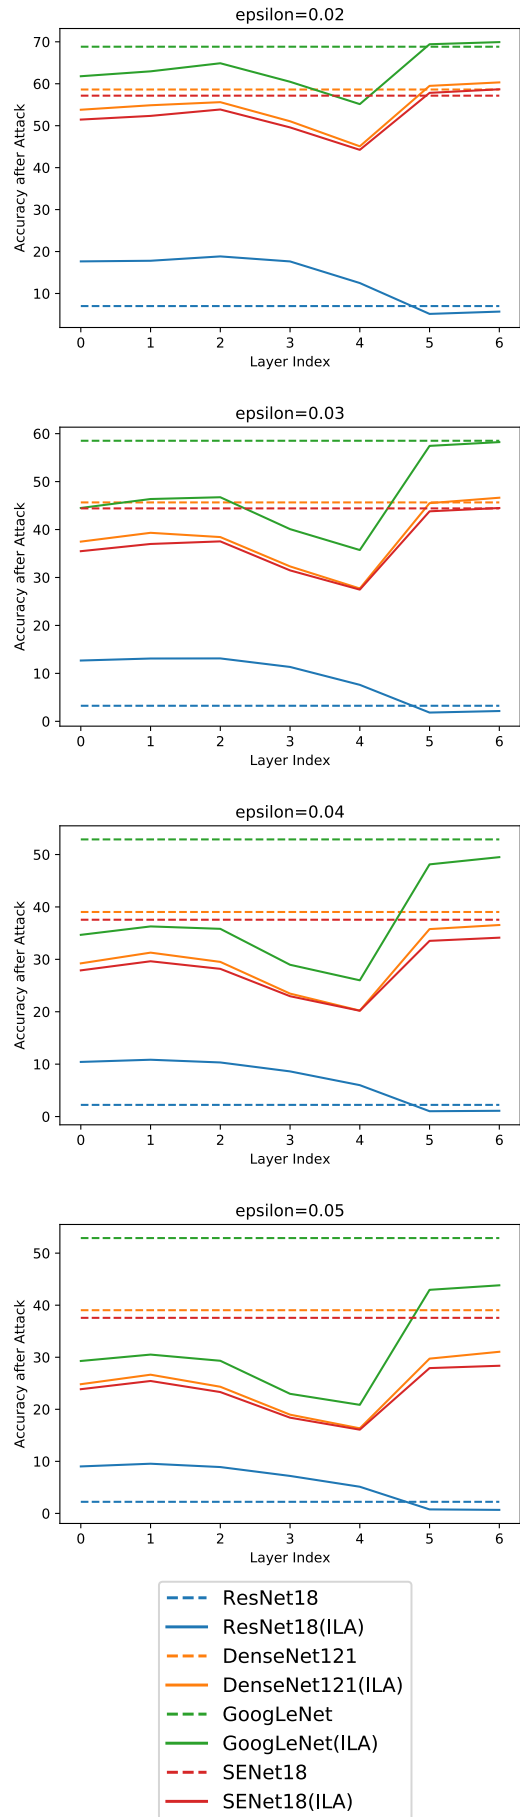

Figure 8: Transferability graphs for different epsilons
